# Supplementary material
Source: PubMed Central journal article supplement (PMC4371001)
Supplement: 11606_2014_3098_MOESM1_ESM.pdf [file 11606_2014_3098_MOESM1_ESM.pdf]

**Diet Drink Consumption and the Risk of Cardiovascular Events: A Report From  
the Women's Health Initiative**

**Ankur Vyas, MD, Linda Rubenstein, PhD, Jennifer Robinson, MD, MPH, Rebecca A.  
Seguin, PhD, CSCS, Mara Z. Vitolins, DrPH, MPH, RD, Rasa Kazlauskaite, MD, MSc, FACE,  
James M. Shikany, DrPH, Karen C. Johnson, MD, MPH, Linda Snetselaar, RD, PhD and  
Robert Wallace, MD, MSc**

**Online Appendix**

Figure 1: Incidence of cardiovascular events (primary outcome) across diet drink consumption categories, stratified by baseline body mass index

Figure 2: Adjusted hazard ratios for cardiovascular events (primary outcome) across diet drink consumption categories, stratified by baseline body mass index

Table 1: Adjusted hazard ratios for cardiovascular risk factors

Table 2: Adjusted hazard ratios for primary and modified outcomes across diet drink consumption strata

Figure 1: Incidence of cardiovascular events (primary outcome) across diet drink consumption categories, stratified by baseline body mass index\*

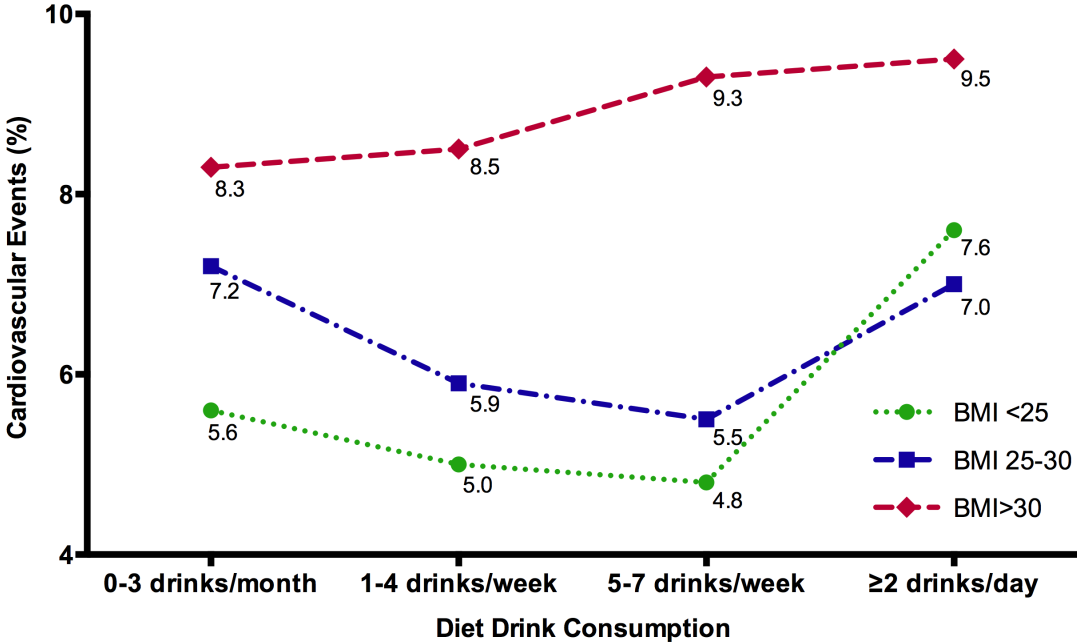

\*Unadjusted incidence of the primary outcome (cardiovascular events), in %.

Figure 2: Adjusted hazard ratios for cardiovascular events (primary outcome) across diet drink consumption categories, stratified by baseline body mass index

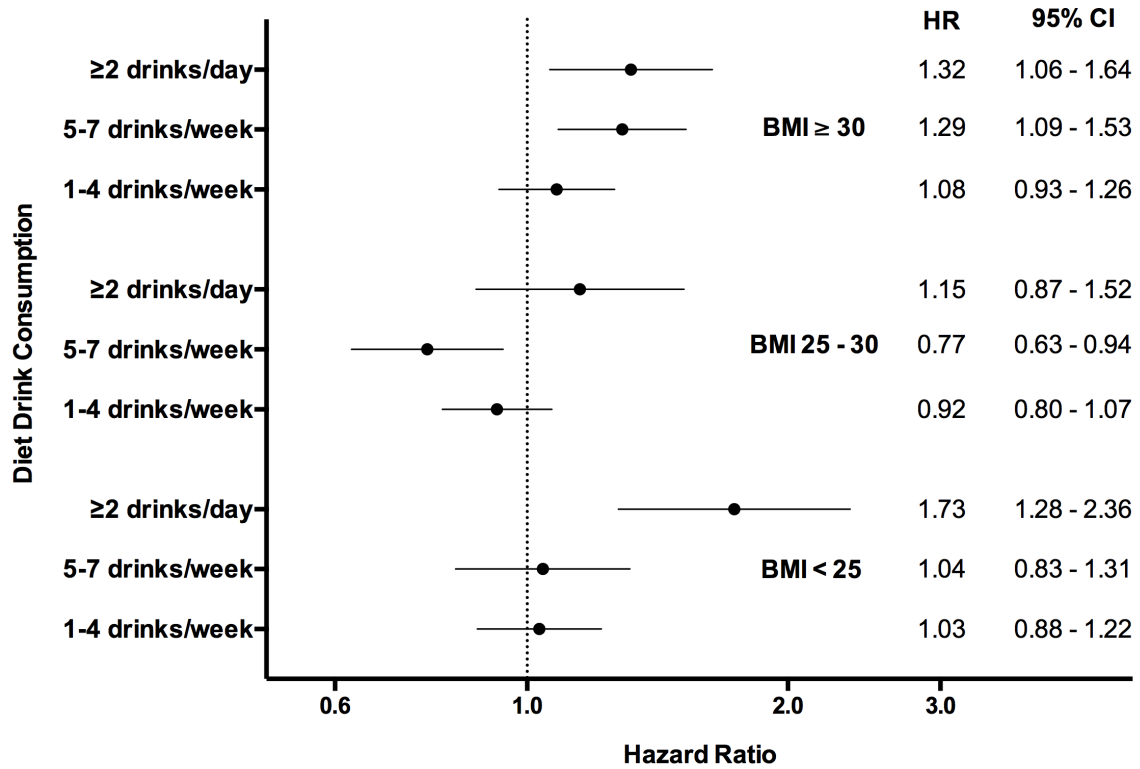

HR: Hazard ratio; CI: Confidence interval; BMI: Body mass index;

Table 1: Adjusted hazard ratios for cardiovascular risk factors<sup>A</sup>

| Risk factors                | Outcomes                           |                            |                            |
|-----------------------------|------------------------------------|----------------------------|----------------------------|
|                             | Cardiovascular Events <sup>B</sup> | Cardiac Death <sup>C</sup> | Overall Death <sup>C</sup> |
|                             | HR (95% CI)                        | HR (95% CI)                | HR (95% CI)                |
| Age (in years)              | 1.1 (1.1-1.1)                      | 1.2 (1.1-1.2)              | 1.1 (1.1-1.1)              |
| Race                        |                                    |                            |                            |
| American Indian             | 1.0 (0.5-2.1)                      | 1.4 (0.4-5.9)              | 1.0 (0.5-2.2)              |
| Asian/Pacific Islander      | 0.5 (0.3-0.7)                      | 0.6 (0.3-1.4)              | 0.9 (0.7-1.1)              |
| Black                       | 0.7 (0.6-0.9)                      | 0.9 (0.6-1.3)              | 1.0 (0.8-1.2)              |
| Hispanic                    | 0.8 (0.6-1.0)                      | 0.9 (0.5-1.9)              | 0.8 (0.5-1.1)              |
| White                       | 1.0                                | 1.0                        | 1.0                        |
| Other                       | 0.9 (0.6-1.4)                      | 1.0 (0.3-2.6)              | 0.8 (0.5-1.3)              |
| Education                   |                                    |                            |                            |
| < High School, High School  | 1.0                                | 1.0                        | 1.0                        |
| Some College                | 0.9 (0.8-1.0)                      | 1.2 (0.9-1.5)              | 1.0 (0.9-1.2)              |
| College Graduate, >College  | 0.8 (0.7-0.9)                      | 1.1 (0.9-1.4)              | 1.0 (0.9-1.1)              |
| Income in dollars           |                                    |                            |                            |
| <35,000                     | 1.0                                | 1.0                        | 1.0                        |
| 35,000-<75,000              | 0.9 (0.8-0.995)                    | 0.8 (0.7-1.0)              | 0.9 (0.8-0.97)             |
| ≥75,000                     | 0.8 (0.7-0.9)                      | 0.7 (0.5-0.96)             | 0.7 (0.6-0.8)              |
| BMI                         |                                    |                            |                            |
| <25 kg/m <sup>2</sup>       | 1.0                                | 1.0                        | 1.0                        |
| 25-30 kg/m <sup>2</sup>     | 1.1 (0.97-1.2)                     | 0.9 (0.7-1.1)              | 0.9 (0.8-1.0)              |
| >30 kg/m <sup>2</sup>       | 1.2 (1.02-1.5)                     | 1.2 (0.8-1.7)              | 1.1 (0.96-1.2)             |
| Smokers                     | 2.0 (1.7-2.4)                      | 2.5 (1.8-3.5)              | 2.5 (2.1-2.9)              |
| Hormone Therapy             |                                    |                            |                            |
| Never                       | 1.0                                | 1.0                        | 1.0                        |
| Estrogen only               | 1.0 (0.9-1.1)                      | 0.8 (0.7-1.0)              | 0.9 (0.8-0.98)             |
| Either/and                  | 0.9 (0.8-1.0)                      | 0.8 (0.6-0.99)             | 0.8 (0.7-0.9)              |
| Unknown type                | 0.2 (0.1-0.9)                      | 0.6 (0.1-4.2)              | 1.2 (0.6-2.2)              |
| History of high cholesterol |                                    |                            |                            |
| No                          | NA <sup>B</sup>                    | 1.0                        | 1.0                        |
| Yes                         |                                    | 0.8 (0.6-1.1)              | 0.8 (0.8-0.96)             |
| History of diabetes         |                                    |                            |                            |
| No                          | 1.0                                | NA <sup>C</sup>            | NA <sup>C</sup>            |
| Yes                         | 1.7 (1.5-1.9)                      |                            |                            |
| Alcohol drinks per week     |                                    |                            |                            |
| <0.5                        | 1.0                                | 1.0                        | 1.0                        |
| 0.5-2                       | 0.9 (0.8-1.1)                      | 0.9 (0.7-1.2)              | 1.0 (0.9-1.1)              |
| >2                          | 1.0 (0.9-1.1)                      | 0.8 (0.7-1.0)              | 0.9 (0.8-0.98)             |

|                              |                |                |               |
|------------------------------|----------------|----------------|---------------|
| Sugar sweetened beverages    |                |                |               |
| None or <1/month             | 1.0            | 1.0            | 1.0           |
| <Once a day                  | 1.0 (0.95-1.1) | 1.0 (0.8-1.2)  | 1.0 (0.9-1.1) |
| Daily                        | 0.9 (0.7-1.1)  | 0.8 (0.5-1.2)  | 0.9 (0.7-1.1) |
| Physical activity            |                |                |               |
| Hours per week walking       | 1.0 (1.0-1.0)  | 1.0 (1.0-1.0)  | 1.0 (1.0-1.0) |
| Total energy expended        | 1.0 (1.0-1.0)  | 1.0 (1.0-1.0)  | 1.0 (1.0-1.0) |
| Log Calibrated Energy Intake | 1.9 (0.7-4.9)  | 2.1 (0.3-16.3) | 2.4 (0.9-6.2) |
| Salt Intake                  | 1.0 (1.0-1.0)  | 1.0 (1.0-1.0)  | 1.0 (1.0-1.0) |

<sup>A</sup>Model IV: adjusted for continuous age, race, education, income, smoking status, BMI, history of diabetes, hypertension, hyperlipidemia, alcohol intake, log calibrated energy intake, physical activity, sugar sweetened beverage intake, salt intake, and hormone therapy.

<sup>B</sup>Cardiovascular events models were stratified by hypertension and high cholesterol because they did not meet proportional hazards assumptions.

<sup>C</sup>Mortality models were stratified by diabetes and hypertension because they did not meet proportional hazards assumptions.

HR: Hazard Ratio; CI: Confidence Intervals; NA: Not Available;

Table 2: Adjusted hazard ratios for primary and modified outcomes across diet drink consumption strata\*

| Diet drink consumption | Outcome                  |                                       |                          |
|------------------------|--------------------------|---------------------------------------|--------------------------|
|                        | Primary outcome          | Primary outcome without heart failure | Heart failure only       |
|                        | HR (95% CI)<br>N: 33,619 | HR (95% CI)<br>N: 33,312              | HR (95% CI)<br>N: 31,766 |
| 0-3/month              | 1.0                      | 1.0                                   | 1.0                      |
| 1-4/week               | 1.0 (0.9-1.1)            | 1.0 (0.9-1.1)                         | 1.0 (0.8-1.4)            |
| 5-7/week               | 1.1 (0.9-1.2)            | 1.1 (0.9-1.2)                         | 1.1 (0.7-1.6)            |
| ≥2/day                 | 1.3 (1.1-1.5)            | 1.3 (1.1-1.6)                         | 1.4 (0.9-2.2)            |

\*Model IV: Adjusted for age, race, education, income, smoking status, BMI, diabetes, hypertension, hyperlipidemia, alcohol intake, log calibrated energy intake, physical activity, sugar sweetened beverage intake, salt intake, and hormone therapy.

Adjusted models for the primary analysis and the primary outcome without heart failure were stratified on the history of high cholesterol and hypertension because they did not meet the proportional hazards assumption.

HR: Hazard ratio; CI: Confidence interval;
